# Supplementary material
Source: PubMed Central journal article supplement (PMC10702332)
Supplement: NIHMS1897614-supplement-Fig_S1.pdf [file NIHMS1897614-supplement-Fig_S1.pdf]

## LEGEND, SUPPLEMENTARY MATERIAL

### **Supplementary Figure S1**

Title: Nursing Facility Accountability and Support Package Subgroup Assignments

Notes: The exhibit displays the criteria utilized to classify Massachusetts nursing homes into subgroups receiving distinct levels of technical support with infection control efforts during the COVID-19 pandemic. Multiple criteria were utilized to classify facilities within the Supplemental Intervention (SI) subgroup, as follows. 44 facilities were classified within the SI subgroup due to scoring beneath the acceptable infection control audit performance threshold. 12 facilities were classified within the SI subgroup due to historical infection control deficiencies and also scored beneath the acceptable infection control audit performance threshold. 68 facilities were classified within the SI subgroup due to historical infection control deficiencies and scored above the acceptable infection control audit performance threshold.

**Supplementary Figure S1: Nursing Facility Accountability and Support Package Subgroup Assignments**

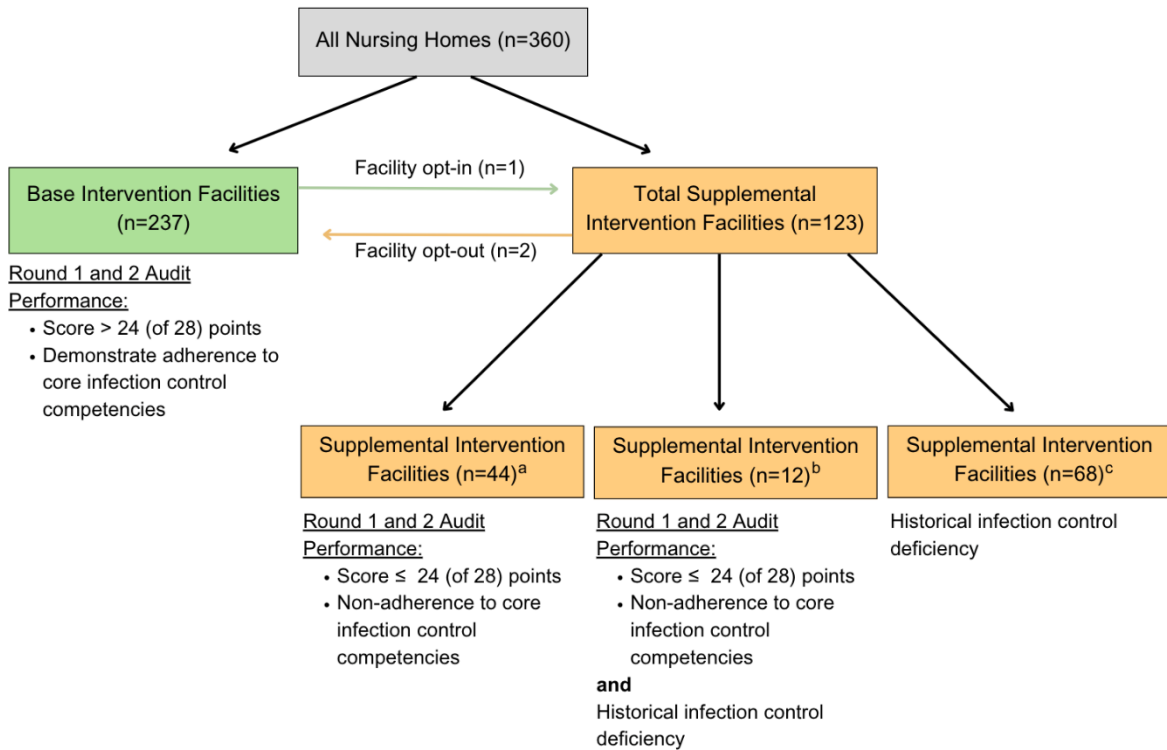

**Footnotes:**

- (a) 44 facilities classified within the SI subgroup due to scoring beneath the acceptable infection control audit performance threshold.
- (b) 12 facilities classified within the SI subgroup due to historical infection control deficiencies also scored beneath the acceptable infection control audit performance threshold.
- (c) 68 facilities classified within the SI subgroup due to historical infection control deficiencies scored above the acceptable infection control audit performance threshold.
